# Supplementary material for: Innovation in Urology: Three Dimensional Printing and Its Clinical Application
Source: Front Surg. 2020 Jun 2;7:29. doi: 10.3389/fsurg.2020.00029 (PMC7282341; doi:10.3389/fsurg.2020.00029)
Supplement: Supplementary file 1 [file Table_1.xlsx]

## Sheet: Search Results
		Reason for exclusion (if applicable)
3D printing of pelvic fracture urethral injuries-fusion of technology and urethroplasty.	Excluded from review	Not available for review
Mechanical and functional validation of a perfused, robot-assisted partial nephrectomy simulation platform using a combination of 3D printing and hydrogel casting.	Included in review	N/A
Incorporation and Validation of Clinically Relevant Performance Metrics of Simulation (CRPMS) into a Novel Full-immersion Simulation Platform for Nerve-sparing Robot-assisted Radical Prostatectomy using Three-dimensional Printing and Hydrogel Molding Technology.	Included in review	N/A
3D printing technology and its role in urological training.	Excluded from review	Review article
Review of the effect of 3D medical printing and virtual reality on urology training with ‘MedTRain3DModsim’ Erasmus + European Union Project	Excluded from review	Not available for review
Structure establishment of three-dimensional (3D) cell culture printing model for bladder cancer.	Included in review	N/A
Current applications of three-dimensional printing in urology.	Excluded from review	Review article
Use 3D printing technology to enhance stone free rate in single tract percutaneous nephrolithotomy for the treatment of staghorn stones.	Included in review	N/A
[Multidisciplinary approach in urology. 3D-technologies in urology].	Excluded from review	Not available for review
A High-Fidelity Phantom for the Simulation and Quantitative Evaluation of Transurethral Resection of the Prostate.	Included in review	N/A
Mri-based cancer lesion analysis with 3d printed patient specific prostate cutting guides.	Included in review	N/A
3D imaging applications for robotic urologic surgery: an ESUT YAUWP review.	Excluded from review	Review article
A case of allograft ureteral stone successfully treated with antegrade ureteroscopic lithotripsy: use of a 3D-printed model to determine the ideal approach.	Included in review	N/A
Three-dimensional printing for laparoscopic partial nephrectomy in patients with renal tumors.	Included in review	N/A
Application of 3-D Printed Kidney Model in Partial Nephrectomy for Predicting Surgical Outcomes: A Feasibility Study.	Included in review	N/A
Stone volume measuring methods: Should the CT based three-dimensional-reconstructed algorithm be proposed as the gold standard? What did the three-dimensional printed models show us?	Not included in review	No added value
Portable model for vasectomy reversal training.	Included in review	N/A
Open Microfluidic Capillary Systems.	Excluded from review	Not urological
Loss of KMT2D induces prostate cancer ROS-mediated DNA damage by suppressing the enhancer activity and DNA binding of antioxidant transcription factor FOXO3.	Excluded from review	Not urological
A minimally invasive alternative for the treatment of nutcracker syndrome using individualized three-dimensional printed extravascular titanium stents.	Included in review	N/A
Design and Validation of a Cervical Laminectomy Simulator using 3D Printing and Hydrogel Phantoms.	Excluded from review	Not urological
Integrative molecular characterization of Chinese prostate cancer specimens.	Excluded from review	Not about 3D printing
Impact of Three-dimensional Printing in Urology: State of the Art and Future Perspectives. A Systematic Review by ESUT-YAUWP Group.	Excluded from review	Review article
Measurement of the Accuracy of 3D-Printed Medical Models to Be Used for Robot-Assisted Partial Nephrectomy.	Not included in review	No added value
Deformable phantoms of the prostatic urinary tract for urodynamic investigations.	Not included in review	No added value
Co-culture of smooth muscle cells and endothelial cells on three-dimensional bioprinted polycaprolactone scaffolds for cavernosal tissue engineering.	Included in review	N/A
3D multi-tissue printing for kidney transplantation.	Included in review	N/A
Patient-specific 3D printed and augmented reality kidney and prostate cancer models: impact on patient education.	Included in review	N/A
A novel ex vivo trainer for robotic vesicourethral anastomosis.	Included in review	N/A
Complete resection of adult prostatic rhabdomyosarcoma with 3D video and printing model: A case report and literature review.	Not included in review	No added value
Two-Year Follow-up on Laparoscopic Three-Dimensional Printed Extravascular Stent Placement for Posterior Nutcracker Syndrome.	Included in review	N/A
Vascular endothelial growth factor immobilized on mussel-inspired three-dimensional bilayered scaffold for artificial vascular graft application: In vitro and in vivo evaluations.	Excluded from review	Not urological
Multi-institutional Evaluation of Producing and Testing a Novel 3D-Printed Laparoscopic Trainer.	Included in review	N/A
Transcending Dimensions: a Comparative Analysis of Cloaca Imaging in Advancing the Surgeon's Understanding of Complex Anatomy.	Included in review	N/A
Current Use of Three-dimensional Model Technology in Urology: A Road Map for Personalised Surgical Planning.	Excluded from review	Review article
Three-Dimensional Printing in Urology: History, Current Applications, and Future Directions.	Excluded from review	Review article
Digitally Tunable Microfluidic Bioprinting of Multilayered Cannular Tissues.	Excluded from review	Not urological
Multiple application of three-dimensional soft kidney models with localized kidney cancer: A pilot study.	Included in review	N/A
Application of an individualized and reassemblable 3D printing navigation template for accurate puncture during sacral neuromodulation.	Included in review	N/A
Impact of a 3D printed model on patients' understanding of renal cryoablation: a prospective pilot study.	Included in review	N/A
Personalized 3D kidney model produced by rapid prototyping method and its usefulness in clinical applications.	Included in review	N/A
Comparison of 3D printed prostate models with standard radiological information to aid understanding of the precise location of prostate cancer: A construct validation study.	Not included in review	No added value
The Endockscope Using Next Generation Smartphones: "A Global Opportunity".	Included in review	N/A
Toward the Design of Personalized Continuum Surgical Robots.	Included in review	N/A
Three-dimensional Printing and Augmented Reality: Enhanced Precision for Robotic Assisted Partial Nephrectomy.	Excluded from review	Video article
Editorial Comment.	Excluded from review	Editorial comment
Quantitative transrectal shear wave elastography undergoing salvage extraperitoneal laparoscopic radical prostatectomy following failed radiotherapy.	Not included in review	No added value
Usefulness of personalized three-dimensional printed model on the satisfaction of preoperative education for patients undergoing robot-assisted partial nephrectomy and their families.	Included in review	N/A
3D Printed Organ Models with Physical Properties of Tissue and Integrated Sensors.	Included in review	N/A
Development of a Three-dimensional Surgical Navigation System with Magnetic Resonance Angiography and a Three-dimensional Printer for Robot-assisted Radical Prostatectomy.	Not included in review	No added value
Three-dimensional printing in robot-assisted radical prostatectomy - an Idea, Development, Exploration, Assessment, Long-term follow-up (IDEAL) Phase 2a study.	Excluded from review	Letter
3D printing in urology: Is it really promising?	Excluded from review	Review article
Development and Validity of a Silicone Renal Tumor Model for Robotic Partial Nephrectomy Training.	Included in review	N/A
The potential of 3D printing in urological research and patient care.	Excluded from review	Review article
[Application of 3D soft print models of the kidney for treatment of patients with localized cancer of the kidney (a pilot study)].	Excluded from review	Not available for review
A novel 3D-printed hybrid simulation model for robotic-assisted kidney transplantation (RAKT).	Included in review	N/A
Three dimensional models in uro-oncology: a future built with additive fabrication.	Excluded from review	Review article
Development and validation of 3D printed virtual models for robot-assisted radical prostatectomy and partial nephrectomy: urologists' and patients' perception.	Included in review	N/A
A novel three-dimensional printed guiding device for electrode implantation of sacral neuromodulation.	Excluded from review	Not urological
Feasibility of Polycaprolactone Scaffolds Fabricated by Three-Dimensional Printing for Tissue Engineering of Tunica Albuginea.	Included in review	N/A
Development of a Patient-specific Tumor Mold Using Magnetic Resonance Imaging and 3-Dimensional Printing Technology for Targeted Tissue Procurement and Radiomics Analysis of Renal Masses.	Included in review	N/A
Validation of a Full-Immersion Simulation Platform for Percutaneous Nephrolithotomy Using Three-Dimensional Printing Technology.	Included in review	N/A
[Application of 3D printing in urology].	Excluded from review	Review article
Expert consensus workshop report: Guideline for three-dimensional-printing template-assisted computed tomography-guided 125I seeds interstitial implantation brachytherapy.	Included in review	N/A
Three-dimensional Printing for Renal Cancer and Surgical Planning.	Excluded from review	Review article
Three-Dimensional Printing of Surgical Clips: An In Vitro Pilot Study and Trial of Efficacy.	Included in review	N/A
Physical Model of Clear-Cell Renal Carcinoma With Inferior Vena Cava Extension Created From a 3-Dimensional Printer to Aid in Surgical Resection: A Case Report.	Included in review	N/A
3D fabrication and characterization of phosphoric acid scaffold with a HA/β-TCP weight ratio of 60:40 for bone tissue engineering applications.	Excluded from review	Not urological
Impact of personalized three-dimensional -3D- printed pelvicalyceal system models on patient information in percutaneous nephrolithotripsy surgery: a pilot study.	Included in review	N/A
Touching the future: three-dimensional printing facilitates preoperative planning, realistic simulation and enhanced precision in robot-assisted laparoscopic partial nephrectomy.	Excluded from review	Letter
Tubular collagen scaffolds with radial elasticity for hollow organ regeneration.	Included in review	N/A
3D-printed soft-tissue physical models of renal malignancies for individualized surgical simulation: a feasibility study.	Included in review	N/A
3D printed renal cancer models derived from MRI data: application in pre-surgical planning.	Included in review	N/A
Laparoscopic Partial Nephrectomy Supported by Training Involving Personalized Silicone Replica Poured in Three-Dimensional Printed Casting Mold.	Included in review	N/A
3D bioprinting of urethra with PCL/PLCL blend and dual autologous cells in fibrin hydrogel: An in vitro evaluation of biomimetic mechanical property and cell growth environment.	Included in review	N/A
Utility of patient-specific silicone renal models for planning and rehearsal of complex tumour resections prior to robot-assisted laparoscopic partial nephrectomy.	Included in review	N/A
Soft 3D-Printed Phantom of the Human Kidney with Collecting System.	Included in review	N/A
A Novel Device to Prevent Stone Fragment Migration During Percutaneous Lithotripsy: Results from an In Vitro Kidney Model.	Included in review	N/A
The CREST Simulation Development Process: Training the Next Generation.	Included in review	N/A
Simulation for Percutaneous Renal Access: Where Are We?	Excluded from review	Review article
Low cost silicone renal replicas for surgical training - technical note.	Included in review	N/A
Three-Dimensional Printing as an Interdisciplinary Communication Tool: Preparing for Removal of a Giant Renal Tumor and Atrium Neoplastic Mass.	Excluded from review	Not available for review
Impact of Three-Dimensional Printed Pelvicaliceal System Models on Residents' Understanding of Pelvicaliceal System Anatomy Before Percutaneous Nephrolithotripsy Surgery: A Pilot Study.	Included in review	N/A
Irreversible Electroporation of Prostate Cancer: Patient-Specific Pretreatment Simulation by Electric Field Measurement in a 3D Bioprinted Textured Prostate Cancer Model to Achieve Optimal Electroporation Parameters for Image-Guided Focal Ablation.	Not included in review	No added value
Percutaneous Nephrolithotomy Using an Individual 3-Dimensionally Printed Surgical Guide.	Included in review	N/A
Do 3D Printing Models Improve Anatomical Teaching About Hepatic Segments to Medical Students? A Randomized Controlled Study.	Excluded from review	Not urological
Author Reply.	Excluded from review	Letter
Editorial Comment.	Excluded from review	Editorial comment
Application of anatomically accurate, patient-specific 3D printed models from MRI data in urological oncology.	Not included in review	No added value
Innovations in surgical stone disease.	Excluded from review	Review article
Three-Dimensional Printing: Basic Principles and Applications in Medicine and Radiology.	Excluded from review	Review article
Patient-specific 3-dimensional Printed Kidney Designed for "4D" Surgical Navigation: A Novel Aid to Facilitate Minimally Invasive Off-clamp Partial Nephrectomy in Complex Tumor Cases.	Included in review	N/A
Do Three-dimensional Visualization and Three-dimensional Printing Improve Hepatic Segment Anatomy Teaching? A Randomized Controlled Study.	Excluded from review	Duplicate article & not urological
The Use of Three-dimensional Printers for Partial Adrenalectomy: Estimating the Resection Limits.	Included in review	N/A
3D vs 2D laparoscopic systems: Development of a performance quantitative validation model.	Excluded from review	Review article
Three-dimensional Printed Model of Prostate Anatomy and Targeted Biopsy-proven Index Tumor to Facilitate Nerve-sparing Prostatectomy.	Included in review	N/A
Three-dimensional printing technique assisted cognitive fusion in targeted prostate biopsy.	Included in review	N/A
Urethral reconstruction with a 3D porous bacterial cellulose scaffold seeded with lingual keratinocytes in a rabbit model.	Included in review	N/A
Comparison of Flow Characteristics of Novel Three-Dimensional Printed Ureteral Stents Versus Standard Ureteral Stents in a Porcine Model.	Included in review	N/A
Personalized 3D printed model of kidney and tumor anatomy: a useful tool for patient education.	Included in review	N/A
Reply: To PMID 26099870.	Excluded from review	Letter
Editorial Comment.	Excluded from review	Editorial comment
Individualized Physical 3-dimensional Kidney Tumor Models Constructed From 3-dimensionalPrinters Result in Improved Trainee Anatomic Understanding.	Included in review	N/A
3D Printing and Its Urologic Applications.	Excluded from review	Review article
Applications of three-dimensional printing technology in urological practice.	Excluded from review	Review article
Initial experience with a tailor-made simulation and navigation program using a 3-D printer model of kidney transplantation surgery.	Included in review	N/A
Evaluation of three-dimensional printing for laparoscopic partial nephrectomy of renal tumors: a preliminary report.	Included in review	N/A
Editorial comment from Dr Isotani to Three-dimensional printing in urological surgery: what are the possibilities?	Excluded from review	Editorial comment
Anti-Reflux Ureteral Stent with Polymeric Flap Valve Using Three-Dimensional Printing: An In Vitro Study.	Included in review	N/A
Editorial comment from Dr Silberstein to Three-dimensional printing in urological surgery: what are the possibilities?	Excluded from review	Editorial comment
Three-dimensional printing in urological surgery: what are the possibilities?	Excluded from review	Review article
A system for evaluating magnetic resonance imaging of prostate cancer using patient-specific 3Dprinted molds.	Included in review	N/A
Development and initial porcine and cadaver experience with three-dimensional printing of endoscopic and laparoscopic equipment.	Included in review	N/A
Editorial comment.	Excluded from review	Editorial comment
Reply: To PMID 24962843.	Excluded from review	Letter
Physical models of renal malignancies using standard cross-sectional imaging and 3-dimensionalprinters: a pilot study.	Included in review	N/A
Use of 3-dimensional printing technology and silicone modeling in surgical simulation: development and face validation in pediatric laparoscopic pyeloplasty.	Included in review	N/A

## Sheet: Additional articles
Bioprinting of 3D Convoluted Renal Proximal Tubules on Perfusable Chips.
Three-dimensional printing surgical instruments: are we there yet?
Tissue-engineered autologous bladders for patients needing cystoplasty.
Transplantation of chondrocytes utilizing a polymer-cell construct to produce tissue-engineeredcartilage in the shape of a human ear.
